# Supplementary material for: Clinical utility and reproducibility of surface electromyography in individuals with chronic low back pain: a protocol for a systematic review and meta-analysis
Source: HighWire-hosted journal article supplement (doi:10.1136/bmjopen-2021-058652), 2022-05-01
Supplement: bmjopen-2021-058652supp001_data_supplement.pdf [file bmjopen-2021-058652supp001_data_supplement.pdf]

Search Strategy Results 10<sup>th</sup> Feb 2022

Table 1. Pubmed (OvidMedline) Search Strategy from 10/02/2022

| SEARCH NUMBER | QUERY                                                                       | RESULTS |
|---------------|-----------------------------------------------------------------------------|---------|
| 1             | Lumbar Vertebrae [Mesh]                                                     | 57,346  |
| 2             | Low back pain                                                               | 43,484  |
| 3             | Back Pain [mesh]                                                            | 42,330  |
| 4             | #1 OR #2 OR #3                                                              | 105,338 |
| 5             | "EMG"                                                                       | 35,854  |
| 6             | Electromyography                                                            | 92,789  |
| 7             | #5 OR #6                                                                    | 101,090 |
| 8             | #4 AND #7                                                                   | 2,534   |
| 9             | Sensitivity and Specificity [mesh]                                          | 630,128 |
| 10            | Reproducibility of Results [mesh]                                           | 440,464 |
| 11            | "Diagnostic Accuracy"                                                       | 52,324  |
| 12            | "Clinical Utility"                                                          | 30,002  |
| 13            | "Diagnostic Utility"                                                        | 5,312   |
| 14            | "Therapeutic Utility"                                                       | 2,454   |
| 15            | "Inter-rater reliability"                                                   | 8,056   |
| 16            | "Intra-class correlation*"                                                  | 6,044   |
| 17            | "Intra-rater reliability"                                                   | 1,790   |
| 18            | Inter-class correlation*                                                    | 221     |
| 19            | Typical error                                                               | 530     |
| 20            | #9 OR #10 OR #11 OR #12 OR #13 OR #14 OR #15 OR #16<br>OR #17 OR #18 OR #19 | 985,013 |
| 21            | #8 AND #20                                                                  | 232     |

Table 2. CINAHL Plus (EBSCOhost) Search Strategy From 10/02/2022

| SEARCH NUMBER | QUERY                                                                       | RESULTS |
|---------------|-----------------------------------------------------------------------------|---------|
| 1             | Lumbar Vertebrae                                                            | 20,594  |
| 2             | Low back pain                                                               | 28,323  |
| 3             | Back Pain                                                                   | 46,393  |
| 4             | #1 OR #2 OR #3                                                              | 61,357  |
| 5             | EMG                                                                         | 9,701   |
| 6             | Electromyography                                                            | 21,439  |
| 7             | #7 OR #8                                                                    | 22,632  |
| 8             | #4 AND #7                                                                   | 1488    |
| 9             | Sensitivity and Specificity                                                 | 115,175 |
| 10            | Reproducibility of Results                                                  | 72,457  |
| 11            | "Diagnostic Accuracy"                                                       | 14,688  |
| 12            | "Clinical Utility"                                                          | 8,162   |
| 13            | "Diagnostic Utility"                                                        | 1,528   |
| 14            | "Therapeutic Utility"                                                       | 239     |
| 15            | (MH "Interrater reliability")                                               | 27,780  |
| 16            | "Interrater Reliability"                                                    | 29,534  |
| 17            | "Inter-rater Reliability"                                                   | 5,154   |
| 18            | #15 OR #16 OR #17                                                           | 31,726  |
| 19            | (MH "Intraclass Correlation Coefficient")                                   | 21,372  |
| 20            | "Intraclass Correlation Coefficient"                                        | 25,501  |
| 21            | "Intraclass Correlation*"                                                   | 28,971  |
| 22            | "Intra-class correlation*"                                                  | 2,706   |
| 23            | #19 OR #20 OR #21 OR #22                                                    | 30,535  |
| 24            | "Intrarater reliability"                                                    | 8,451   |
| 25            | "Intra-rater reliability"                                                   | 1,065   |
| 26            | #24 OR #25                                                                  | 8,952   |
| 27            | "Interclass correlation*"                                                   | 699     |
| 28            | "Inter-class correlation*"                                                  | 73      |
| 29            | #27 OR #28                                                                  | 772     |
| 30            | Typical error                                                               | 1,470   |
| 31            | #9 OR #10 OR #11 OR #12 OR #13 OR #14 OR #18 OR #23<br>OR #26 OR #29 OR #30 | 226,726 |
| 32            | #31 AND #8                                                                  | 156     |

Table 3. Web of Science (Medline) Search Strategy from 15/02/2022  
Between the years; 1950 – 2022

| SEARCH NUMBER | QUERY                                                                       | RESULTS |
|---------------|-----------------------------------------------------------------------------|---------|
| 1             | Lumbar Vertebrae                                                            | 64,740  |
| 2             | Low back pain                                                               | 49,944  |
| 3             | Back Pain                                                                   | 79,590  |
| 4             | #1 OR #2 OR #3                                                              | 131,986 |
| 5             | EMG                                                                         | 34,302  |
| 6             | Electromyography                                                            | 92,607  |
| 7             | #5 OR #6                                                                    | 99,697  |
| 8             | #4 AND #7                                                                   | 2,920   |
| 9             | “Sensitivity and Specificity”                                               | 413,135 |
| 10            | Reproducibility of Results                                                  | 461,434 |
| 11            | Diagnostic Accuracy                                                         | 138,470 |
| 12            | Clinical Utility                                                            | 84,856  |
| 13            | Diagnostic Utility                                                          | 45,375  |
| 14            | Therapeutic Utility                                                         | 32,658  |
| 15            | Inter-rater reliability                                                     | 9,521   |
| 16            | intraclass correlation*                                                     | 30,032  |
| 17            | Intra-rater reliability                                                     | 2,499   |
| 18            | Interclass correlation*                                                     | 1,792   |
| 19            | Typical error                                                               | 7,808   |
| 20            | #9 OR #10 OR #11 OR #12 OR #13 OR #14 OR #15 OR #16<br>OR #17 OR #18 OR #19 | 962,459 |
| 21            | #8 AND #20                                                                  | 270     |

Table 4. Embase (Ovid Medline) Search Strategy from 15/02/2022  
Between 1947-2022

| SEARCH NUMBER | QUERY                                                                       | RESULTS  |
|---------------|-----------------------------------------------------------------------------|----------|
| 1             | Lumbar Vertebrae [Mesh]                                                     | 25,769   |
| 2             | Low back pain                                                               | 74,543   |
| 3             | Back Pain [mesh]                                                            | 139,195  |
| 4             | #1 OR #2 OR #3                                                              | 161,018  |
| 5             | EMG                                                                         | 53,615   |
| 6             | Electromyography                                                            | 103,763  |
| 7             | #5 OR #6                                                                    | 127,163  |
| 8             | #4 AND #7                                                                   | 3,191    |
| 9             | Sensitivity and Specificity                                                 | 574,921  |
| 10            | Reproducibility of Results [mesh]                                           | 243,375  |
| 11            | Diagnostic Accuracy                                                         | 297,124  |
| 12            | Clinical Utility                                                            | 44,336   |
| 13            | Diagnostic Utility                                                          | 10175    |
| 14            | Therapeutic Utility                                                         | 3319     |
| 15            | Interrater reliability*                                                     | 11623    |
| 16            | Intraclass correlation*                                                     | 26554    |
| 17            | Intrarater reliability*                                                     | 7,841    |
| 18            | Interclass correlation*                                                     | 2,363    |
| 19            | Typical error                                                               | 551      |
| 20            | #9 OR #10 OR #11 OR #12 OR #13 OR #14 OR #15 OR #16<br>OR #17 OR #18 OR #19 | 103,4905 |
| 21            | #8 AND #20                                                                  | 158      |

Table 5: Scopus (Elsevier) Search Strategy from 15/02/2022

| SEARCH NUMBER | QUERY                                                                       | RESULTS   |
|---------------|-----------------------------------------------------------------------------|-----------|
| 1             | "Lumbar Vertebrae"                                                          | 69,321    |
| 2             | "Low back pain"                                                             | 171,415   |
| 3             | "Back Pain"                                                                 | 223,102   |
| 4             | #1 OR #2 OR #3                                                              | 271,344   |
| 5             | EMG                                                                         | 139,121   |
| 6             | Electromyography                                                            | 206,064   |
| 7             | #5 OR #6                                                                    | 270,441   |
| 8             | #4 AND #7                                                                   | 19,650    |
| 9             | "Sensitivity and Specificity"                                               | 618,069   |
| 10            | "Reproducibility of Results"                                                | 385,004   |
| 11            | "Diagnostic Accuracy"                                                       | 432,186   |
| 12            | "Clinical Utility"                                                          | 169,591   |
| 13            | "Diagnostic Utility"                                                        | 49,010    |
| 14            | "Therapeutic Utility"                                                       | 8,600     |
| 15            | "Interrater reliability*"                                                   | 64,308    |
| 16            | "Intraclass correlation*"                                                   | 61,219    |
| 17            | "Intrarater reliability*"                                                   | 11,206    |
| 18            | "Interclass correlation*"                                                   | 2,121     |
| 19            | "Typical error"                                                             | 1,132     |
| 20            | #9 OR #10 OR #11 OR #12 OR #13 OR #14 OR #15 OR #16<br>OR #17 OR #18 OR #19 | 1,798,143 |
| 21            | #8 AND #20                                                                  | 3,205     |

Table 6. Google Scholar search strategy from 15/02/2022

| SEARCH NUMBER | QUERY                                                                       | RESULTS |
|---------------|-----------------------------------------------------------------------------|---------|
| 1             | Lumbar Vertebrae                                                            | 33,700  |
| 2             | Low back pain                                                               | 872,000 |
| 3             | Back Pain                                                                   | 957,000 |
| 4             | #1 OR #2 OR #3                                                              | 153,000 |
| 5             | EMG                                                                         | 73,000  |
| 6             | Electromyography                                                            | 51,500  |
| 7             | #5 OR #6                                                                    | 106,000 |
| 8             | #4 AND #7                                                                   | 10,400  |
| 9             | Sensitivity and Specificity                                                 | 582,000 |
| 10            | "Reproducibility of Results"                                                | 4,650   |
| 11            | "Diagnostic Accuracy"                                                       | 206,000 |
| 12            | "Clinical Utility"                                                          | 190,000 |
| 13            | "Diagnostic Utility"                                                        | 21,300  |
| 14            | "Therapeutic Utility"                                                       | 8,700   |
| 15            | Interrater reliability                                                      | 34,300  |
| 16            | Intraclass correlation                                                      | 15,300  |
| 17            | Intrarater reliability                                                      | 5,780   |
| 18            | Interclass correlation                                                      | 2,590   |
| 19            | Typical error                                                               | 397,000 |
| 20            | #9 OR #10 OR #11 OR #12 OR #13 OR #14 OR #15 OR #16<br>OR #17 OR #18 OR #19 | 116,000 |
| 21            | #8 AND #20                                                                  | 2,880   |
